# Supplementary material for: Obesity reprograms the pulmonary polyunsaturated fatty acid-derived lipidome, transcriptome, and gene-oxylipin networks
Source: PubMed Central journal article supplement (PMC9508350; doi:10.1016/j.jlr.2022.100267), 2022-08-24
Supplement: mmc1.pdf [file mmc1.pdf]

**SUPPLEMENTAL INFORMATION:**

**Obesity reprograms the pulmonary polyunsaturated fatty acid-derived lipidome, transcriptome, and gene-oxylin networks**

Rafia Virk<sup>1</sup>, Nicole Buddenbaum<sup>1</sup>, Abrar Al-Shaer<sup>1</sup>, Michael Armstrong<sup>2</sup>, Jonathan Manke<sup>2</sup>, Nichole Reisdorph<sup>2</sup>, Selin Sergin<sup>3</sup>, Jenifer I. Fenton<sup>3</sup>, E. Diane Wallace<sup>4</sup>, Brandie M. Ehrmann<sup>4</sup>, Hannah B. Lovins<sup>5</sup>, Kymberly M. Gowdy<sup>5</sup>, M Ryan Smith<sup>6,7</sup>, Gregory Smith<sup>8,9</sup>, Samir Kelada<sup>8,9</sup>, and Saame Raza Shaikh<sup>1</sup>

<sup>1</sup>Department of Nutrition, Gillings School of Global Public Health and School of Medicine, The University of North Carolina at Chapel Hill, Chapel Hill NC USA

<sup>2</sup>Department of Pharmaceutical Sciences, University of Colorado Denver Anschutz Medical Campus, Aurora CO USA

<sup>3</sup>Department of Food Science and Human Nutrition, College of Agriculture and Natural Resources and College of Osteopathic Medicine, Michigan State University, East Lansing Michigan USA

<sup>4</sup>Department of Chemistry, University of North Carolina at Chapel Hill, Chapel Hill NC USA

<sup>5</sup>Division of Pulmonary, Critical Care and Sleep Medicine, The Ohio State University, Columbus OH USA

<sup>6</sup>Division of Pulmonary, Allergy, Critical Care, and Sleep Medicine, Department of Medicine, Emory University, Atlanta GA USA

<sup>7</sup>Atlanta Department of Veterans Affairs Medical Center, Decatur, GA, USA

<sup>8</sup>Marsico Lung Institute, University of North Carolina at Chapel Hill, Chapel Hill NC USA

<sup>9</sup>Department of Genetics, University of North Carolina at Chapel Hill, Chapel Hill NC USA

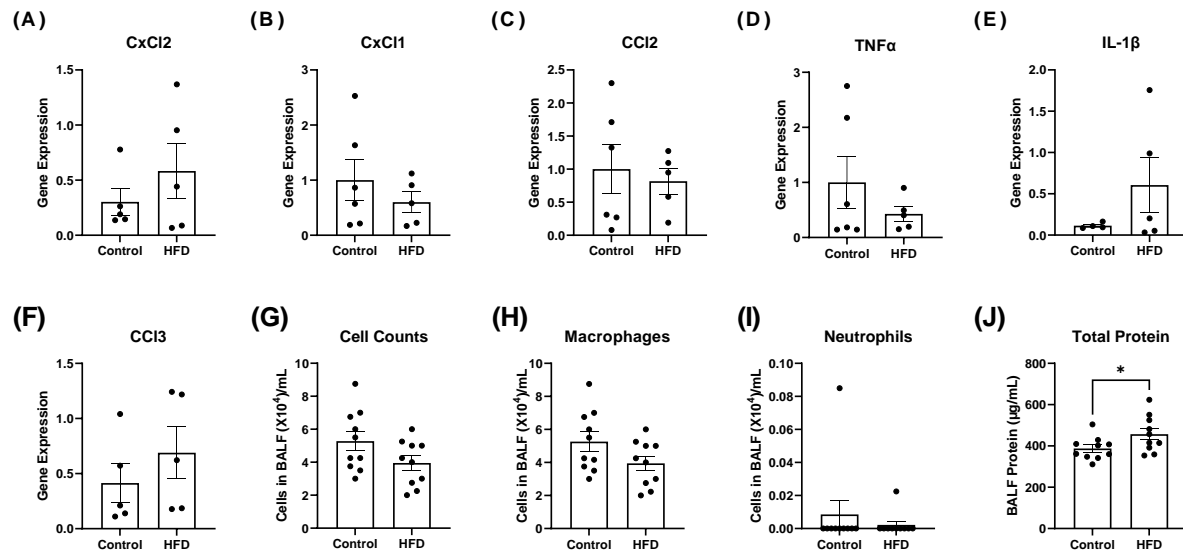

**Supplemental Figure S1: Pulmonary inflammatory profile of C57BL/6 mice consuming a high fat diet.** The gene expression of (A) C-X-C motif chemokine ligand 1 (CxCl1), (B) C-X-C motif chemokine ligand 2 (CxCl2), (C) CC motif chemokine ligand 2 (CCl2), (D) CC motif chemokine ligand 2 (CCl2), (E) tumor necrosis factor alpha (TNF $\alpha$ ), and (F) interleukin 1 beta (IL-1 $\beta$ ) was determined by real-time PCR analysis of lung tissue for C57BL/6J male mice that either consumed a lean control or a high fat diet (HFD) for 15 weeks. (G) Differential cell counts, (H) percentage of macrophages, (I) percentage of neutrophils, and (J) total protein in bronchoalveolar lavage fluid (BALF). Data are mean  $\pm$  SEM from 5-6 mice per group for A-F and 10 mice per group for G-J. \*P < 0.05 from unpaired t-test.

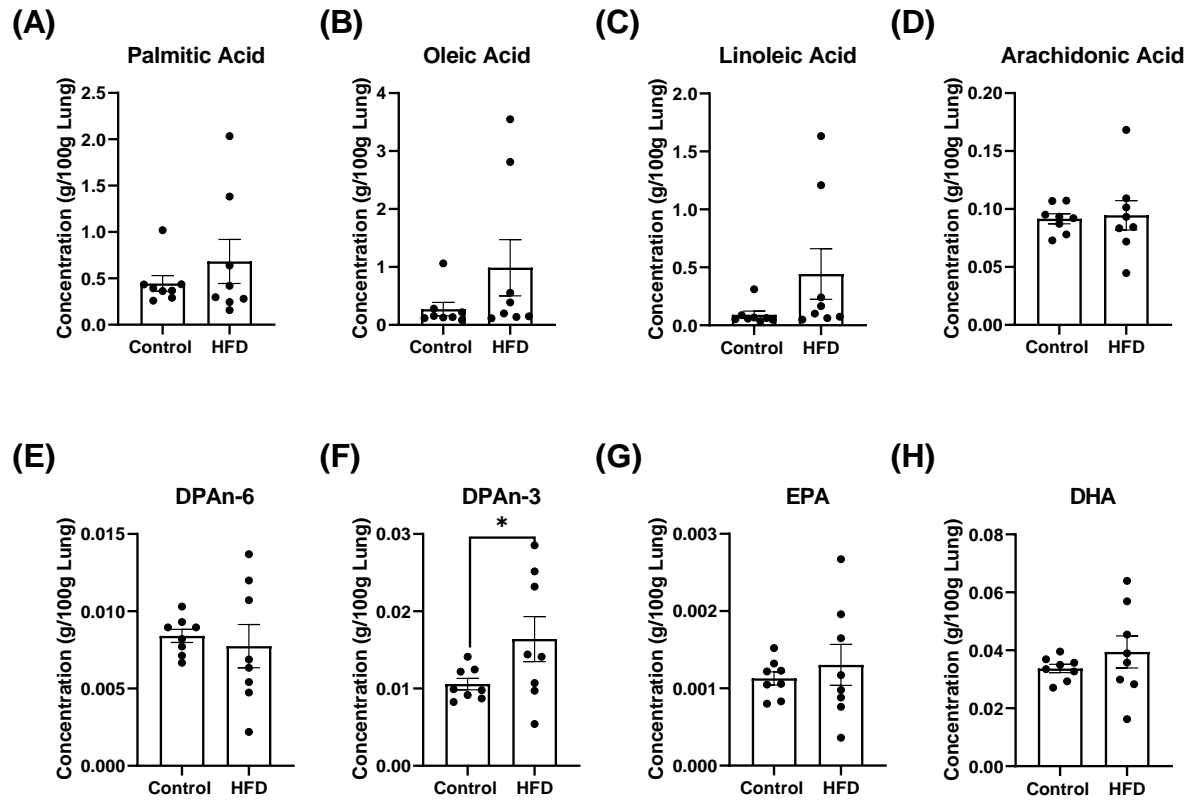

**Supplemental Figure S2: The concentration of select pulmonary fatty acids is increased with a high fat diet.** (A) Palmitic acid, (B) oleic acid, (C) linoleic acid, (D) arachidonic acid, (E) n-6 docosapentaenoic acid (DPAn-6), (F) n-3 docosapentaenoic acid (DPAn-3), (G) eicosapentaenoic acid (EPA), and (H) docosahexaenoic acid (DHA). C57BL/6J male mice consumed a lean control or a high fat diet (HFD) for 15 weeks. Isolated left lungs at age 21-22 weeks were used for targeted gas chromatography analysis. Data are mean  $\pm$  SEM from 7-8 mice per group. \* $P < 0.05$  from unpaired t-test.

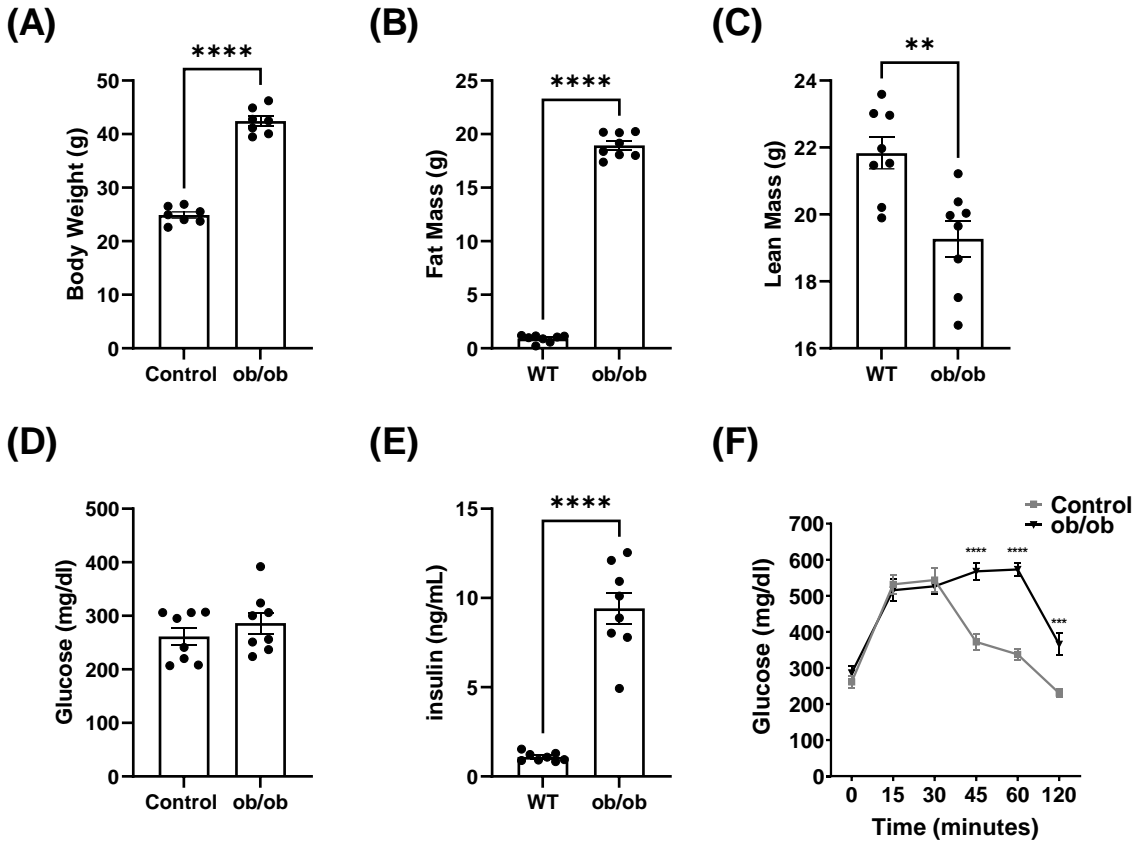

**Supplemental Figure S3: Metabolic profile of a genetic model of obesity.** (A) Body weights. (B) Fat mass and (C) lean mass obtained by Echo MRI. (D) Fasting glucose and (E) fasting insulin levels after a 5 h fast. (F) Glucose tolerance test completed after a 5 h fast by intraperitoneal injection of glucose. For all measurements, genetically obese (*ob/ob*) male mice and lean control mice were purchased from Jackson Laboratory at 7 weeks of age and were fed normal chow for 3 weeks. Metabolic characterization was conducted at age 10 weeks where the body weights were matched with the body weights of mice fed a high fat diet. Data are mean  $\pm$  SEM from 7-8 mice per group. \*\* $P < 0.01$ , \*\*\* $P < 0.001$ , \*\*\*\* $P < 0.0001$  from unpaired t-test for A through E and 2-way ANOVA with Šídák's multiple comparisons test for F.

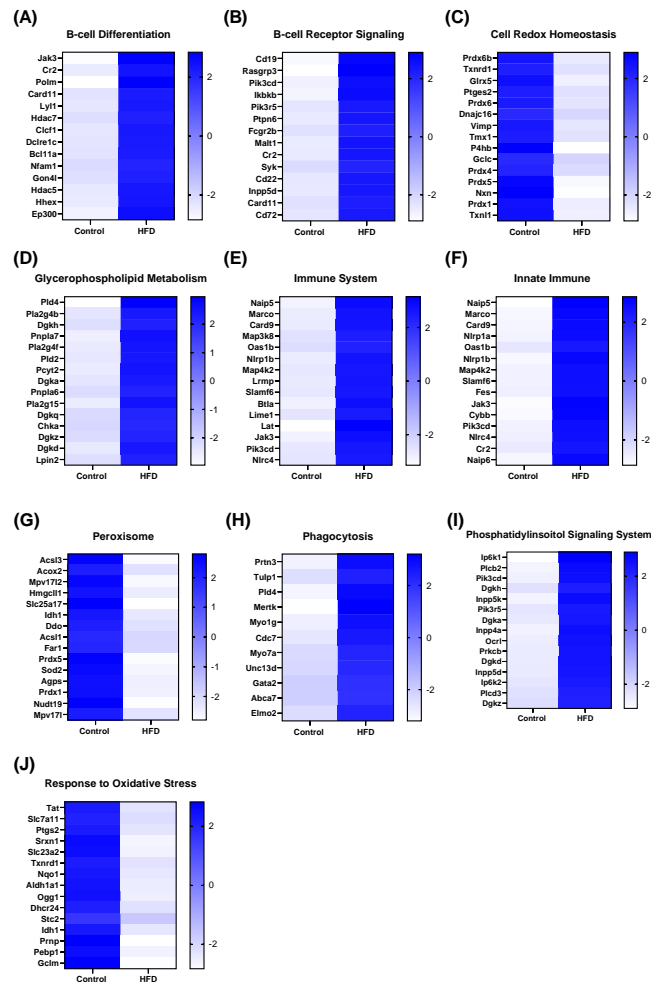

**Supplemental Figure S4: Heat maps for immune-related and lipid-metabolism-related pathways and biological processes in response to high fat diet.** (A) B-cell differentiation, (B) B-cell receptor signaling, (C) cell redox homeostasis, (D) glycerophospholipid metabolism, (E) immune system, (F) innate immune, (G) Peroxisome, (H) Phagocytosis, (I) phosphatidylinositol signaling system, and (J) response to oxidative stress. The heat map data are normalized to z-scores for the top 15 genes with the greatest absolute fold change and lowest adjusted p-value. C57BL/6J male mice consumed a control diet or an experimental high fat diet (HFD) for 15 weeks. N = 7-8 mice per group. All depicted pathways and biological processes are significant based on differential gene expression (DeSeq) analysis in R with Benjamani-Hochberg p-adjusted < 0.1.

| Compound                                 | Fatty acid precursor | Associated pathway | Retention time | MRM         | CE | R <sup>2</sup> | LOD (pg) | LLOQ (pg) | ULOQ (pg) | Internal Standard |
|------------------------------------------|----------------------|--------------------|----------------|-------------|----|----------------|----------|-----------|-----------|-------------------|
| Resolvin E1 (RVE1)                       | EPA                  | CYP/5-LOX          | 5.5            | 349.2>107.0 | 14 | 0.993          | 0.353    | 1.25      | 250       | 8-iso-PGF2a-d4    |
| 8-iso-15R-PGF2a                          | AA                   | ROS                | 7.48           | 353.2>193.1 | 16 | 0.991          | 0.34     | 2.5       | 250       | 8-iso-PGF2a-d4    |
| 8-iso-PGF2a                              | AA                   | ROS                | 7.62           | 353.2>193.1 | 16 | 0.995          | 0.717    | 1.25      | 250       | 8-iso-PGF2a-d4    |
| Thromboxane B2 (TXB2)                    | AA                   | COX                | 7.66           | 369.2>168.9 | 18 | 0.993          | 0.103    | 1.25      | 5000      | 8-iso-PGF2a-d4    |
| (11B)PGF2a                               | AA                   | COX                | 7.83           | 353.2>193.1 | 16 | 0.995          | 0.193    | 0.25      | 250       | 8-iso-PGF2a-d4    |
| PGE2                                     | AA                   | COX                | 8.42           | 351.2>315.2 | 8  | 0.998          | 0.126    | 0.25      | 5000      | PGE2-d4           |
| Resolvin D3 (RVD3)                       | DHA                  | 15-LOX             | 8.48           | 375.2>146.9 | 14 | 0.997          | 0.365    | 0.5       | 250       | PGE2-d4           |
| PGF2a                                    | AA                   | COX                | 8.51           | 353.2>309.2 | 16 | 0.997          | 0.06     | 0.25      | 5000      | PGF2a-D9          |
| Prostaglandin D <sub>2</sub>             | AA                   | COX                | 8.64           | 351.2>315.3 | 10 | 0.996          | 0.173    | 0.5       | 5000      | PGF2a-D9          |
| Resolvin D2 (RVD2)                       | DHA                  | 15-LOX             | 8.78           | 375.2>141.0 | 13 | 0.995          | 0.793    | 1.25      | 250       | Resolvin D2-d5    |
| Lipoxin B4 (LXB4)                        | AA                   | 5-LOX              | 8.85           | 351.2>220.9 | 14 | 0.995          | 0.614    | 1.25      | 250       | Resolvin D2-d5    |
| 6 $\alpha$ -Prostaglandin I <sub>1</sub> | AA                   | COX                | 9.41           | 353.2>129.0 | 22 | 0.994          | 0.054    | 0.5       | 5000      | 8-iso-PGF2a-d4    |
| Resolvin D1 (RVD1)                       | DHA                  | 15-LOX             | 9.54           | 375.2>141.0 | 13 | 0.998          | 0.19     | 0.5       | 250       | Resolvin D1-d5    |
| 17(R)-Resolvin D1 (17R-RVD1)             | DHA                  | 15-LOX             | 9.63           | 375.2>140.9 | 14 | 0.995          | 0.072    | 0.5       | 250       | Resolvin D1-d5    |
| Lipoxin A4 (LXA4)                        | AA                   | 5-LOX              | 9.79           | 351.2>114.9 | 13 | 0.997          | 0.249    | 0.5       | 250       | Resolvin D2-d5    |
| 15(R)Lipoxin A4 (15R-LXA4)               | AA                   | 5-LOX              | 9.81           | 351.2>114.9 | 14 | 0.997          | 0.125    | 1.25      | 250       | Resolvin D2-d5    |
| LTD4                                     | AA                   | 5-LOX/GST          | 10.47          | 495.3>176.9 | 17 | 0.994          | 0.063    | 1.25      | 250       | LTD4-d5           |
| 7S Maresin R1                            | DHA                  | 12-LOX             | 11.96          | 359.2>250.0 | 9  | 0.994          | 0.488    | 5         | 250       | Resolvin D2-d5    |
| 10,17-DiHDoHE                            | DHA                  | 15-LOX             | 12.34          | 359.2>153.0 | 13 | 0.994          | 0.245    | 0.25      | 250       | LTB4-d4           |
| LTE4                                     | AA                   | 5-LOX/GST          | 12.38          | 438.2>333.1 | 17 | 0.991          | 0.205    | 0.25      | 250       | LTE4-d5           |
| 7R Maresin R1                            | DHA                  | 15-LOX             | 12.41          | 359.2>250.0 | 17 | 0.997          | 0.908    | 5         | 250       | LTB4-d4           |
| Resolvin D5 (RVD5)                       | DHA                  | 15-LOX             | 12.41          | 359.2>199.0 | 14 | 0.996          | 0.133    | 1.25      | 250       | LTB4-d4           |
| LTB4                                     | AA                   | 5-LOX              | 12.9           | 335.2>195.1 | 13 | 0.999          | 0.121    | 0.25      | 5000      | LTB4-d4           |
| 18-HEPE                                  | EPA                  | 15-LOX             | 15.02          | 317.2>299.0 | 14 | 0.994          | 2.311    | 5         | 5000      | LTB4-d4           |
| 12-HEPE                                  | EPA                  | 12-LOX             | 15.86          | 317.2>299.0 | 14 | 0.995          | 1.848    | 5         | 5000      | LTB4-d4           |
| 13-HODE                                  | LA                   | 15-LOX             | 16.4           | 295.2>277.1 | 18 | 0.997          | 0.897    | 25        | 5000      | 9(S)-HODE-d4      |
| 13-OxoODE                                | LA                   | 15-LOX             | 16.48          | 293.2>113.0 | 22 | 0.999          | 1.059    | 5         | 5000      | LTB4-d4           |
| 9-HODE                                   | LA                   | NA                 | 16.61          | 295.2>277.0 | 18 | 0.998          | 0.934    | 12.5      | 5000      | 9(S)-HODE-d4      |
| 15-HETE                                  | AA                   | 15-LOX             | 16.78          | 319.2>219.1 | 9  | 0.997          | 0.545    | 2.5       | 5000      | LTB4-d4           |
| 17-HDHA                                  | DHA                  | 15-LOX             | 16.82          | 343.2>281.2 | 9  | 0.992          | 3.624    | 5         | 5000      | LTB4-d4           |

|                                           |     |            |       |                 |    |        |       |      |      |              |
|-------------------------------------------|-----|------------|-------|-----------------|----|--------|-------|------|------|--------------|
| 9-OxoODE                                  | LA  | NA         | 16.84 | 293.2>185<br>.0 | 22 | 0.997* | 0.163 | 0.25 | 5000 | 9(S)-HODE-d4 |
| 14-HDHA                                   | DHA | 12-<br>LOX | 17.12 | 343.2>205<br>.0 | 9  | 0.995  | 0.172 | 1.25 | 5000 | LTB4-d4      |
| 12-HETE                                   | AA  | 12-<br>LOX | 17.4  | 319.2>178<br>.7 | 13 | 0.995  | 0.188 | 1.25 | 5000 | 9(S)-HODE-d4 |
| 8-HETE                                    | AA  | ROS        | 17.51 | 319.2>154<br>.9 | 13 | 0.997  | 0.605 | 1.25 | 5000 | LTB4-d4      |
| 5-HETE                                    | AA  | 5-LOX      | 18.08 | 319.2>115<br>.0 | 9  | 0.998* | 2.035 | 2.5  | 5000 | 5(S)-HETE-d8 |
| 14(15)-EET                                | AA  | CYP        | 18.1  | 319.2>301<br>.1 | 10 | 0.998  | 0.269 | 0.5  | 250  | 9(S)-HODE-d4 |
| 11(12)-EET                                | AA  | CYP        | 18.65 | 319.2>178<br>.8 | 10 | 0.995  | 0.089 | 0.25 | 250  | 9(S)-HODE-d4 |
| Carbocyclic<br>Thromboxane A <sub>2</sub> | AA  | COX        | 18.76 | 347.3>247<br>.0 | 22 | 0.995  | 0.647 | 1.25 | 250  | 9(S)-HODE-d4 |
| 8(9)-EET                                  | AA  | CYP        | 18.86 | 319.2>301<br>.1 | 10 | 0.996  | 0.925 | 5    | 250  | 9(S)-HODE-d4 |

**Internal Standards**

| Compound       | Fatty acid precursor | Associated pathway | Retention time | MRM             | CE | Conc. (pg/on column) |
|----------------|----------------------|--------------------|----------------|-----------------|----|----------------------|
| 8-iso-PGF2a-d4 | AA                   | ROS                | 8.1            | 357.2>197<br>.1 | 26 | 50                   |
| PGE2-d4        | AA                   | COX                | 8.38           | 355.2>319<br>.2 | 8  | 50                   |
| PGF2a-D9       | AA                   | COX                | 8.44           | 362.3>318<br>.3 | 21 | 50                   |
| Resolvin D2-d5 | DHA                  | 15-<br>LOX         | 8.73           | 380.2>141<br>.0 | 13 | 50                   |
| Resolvin D1-d5 | DHA                  | 15-<br>LOX         | 9.48           | 380.2>141<br>.0 | 13 | 50                   |
| LTD4-d5        | AA                   | 5-<br>LOX/G<br>ST  | 10.42          | 500.3>176<br>.8 | 18 | 50                   |
| LTE4-d5        | AA                   | 5-<br>LOX/G<br>ST  | 12.34          | 443.3>338<br>.2 | 18 | 50                   |
| LTB4-d4        | AA                   | 5-LOX              | 12.86          | 339.2>197<br>.1 | 13 | 50                   |
| 9(S)-HODE-d4   | LA                   | NA                 | 16.54          | 299.3>281<br>.3 | 18 | 50                   |
| 5(S)-HETE-d8   | DHA                  | 5-LOX              | 17.99          | 327.3>115<br>.9 | 14 | 50                   |

\*These compounds use a quadratic fit; all other compounds use linear fit

Fatty acid precursors; AA=arachidonic acid, DHA=docosahexaenoic acid, EPA=eicosapentaenoic acid, LA=linoleic acid

Associated pathway; COX=cyclooxygenase, CYP=cytochrome-p450, GST=glutathione S-transferase, 5-LOX=5-lipoxygenase,

12-LOX=12-Lipoxygenase, 15-LOX=15-lipoxygenase,

ROS=reactive oxygen species

**Supplemental Table S1: MRM detection parameters and quantitation limits for all compounds, including internal standards utilizing a fixed fragmentor voltage of 380 V.** All compounds demonstrated a linear calibration fit unless otherwise noted. Limit of detection (LOD), lower limit of quantitation (LLOQ) and upper limit of quantitation (ULOQ) were also evaluated.

| KEGG Pathway                                 | Count | %     | PValue   | Genes                                                                                                                                                                                                                                                                                                                                                                                                                                                                                                                                                                                                                                                                                                                                                                                                                                                                                                                                                                                                                                                                                                                                                        | List Total | Pop Hits | Pop Total | Fold Enrichment | Bonferroni | Benjamini | FDR      |
|----------------------------------------------|-------|-------|----------|--------------------------------------------------------------------------------------------------------------------------------------------------------------------------------------------------------------------------------------------------------------------------------------------------------------------------------------------------------------------------------------------------------------------------------------------------------------------------------------------------------------------------------------------------------------------------------------------------------------------------------------------------------------------------------------------------------------------------------------------------------------------------------------------------------------------------------------------------------------------------------------------------------------------------------------------------------------------------------------------------------------------------------------------------------------------------------------------------------------------------------------------------------------|------------|----------|-----------|-----------------|------------|-----------|----------|
| Protein processing in endoplasmic reticulum  | 42    | 2.281 | 7.53E-11 | TRAM1, SAR1B, RPN1, HSPA4L, UBE2D3, UBE2D2A, HSPBP1, UBE2J1, SEC61A1, HSPH1, BAG2, LMAN2, SKP1A, UBQLN2, TXNDC5, BCAP31, XBP1, SEC13, HSPA5, AMFR, EDEM2, SSR3, DNAJB12, UBE2E2, HSPA2, RAD23B, EIF2S1, SVIP, PDIA6, CKAP4, PDIA4, DNAJC3, NPLOC4, DAD1, DNAJA2, DNAJB11, STT3A, P4HB, CRYAA, SEC24D, HSPA1B, VIMP                                                                                                                                                                                                                                                                                                                                                                                                                                                                                                                                                                                                                                                                                                                                                                                                                                           | 626        | 168      | 7691      | 3.071           | 2.09E-08   | 2.09E-08  | 2.02E-08 |
| Metabolic pathways                           | 160   | 8.691 | 1.73E-09 | GALNT12, CHPF, UXS1, ACSM1, NAGLU, PPAT, SEPHS2, ACSL1, OXSM, ALG5, ALG2, ALG11, CMBL, MAT1A, ACSL3, PGD, PLA2G16, ALDH3A1, PGP, ACOT2, ACOT1, SUCLG2, LAP3, ALG10B, GNE, IPPK, UGT8A, NDUFB11, RPN1, ATP5J, UAP1, ADH7, AK7, AK8, LDHB, EBP, LDHA, FUT9, PPCS, ALDH3B1, RDH10, ATP5D, PGK1, ST3GAL6, HMGCLL1, MPST, GGT6, ST8SIA1, IDH1, GFPT2, GFPT1, ASNS, DHCR24, MCAT, PRDX6, PAICS, QDPR, POLA1, SQLE, GRHPR, HAL, GCLC, ADI1, CYP2S1, STT3A, ALPL, PLCH1, ALDH18A1, GALNTL6, GCLM, GALK1, GLT28D2, B4GALT1, ALAS1, PYCRL, HIBADH, TAT, PIGYL, GMPPB, SMPD3, THTPA, SPTLC1, ALDH2, SPTLC3, SMPD1, RFK, B3GALT2, AOX3, DBT, ME1, IDS, HIBCH, COX8A, CBR2, CERS3, CBR1, PCYT1B, UGT1A1, SPHK2, AKR1A1, AMPD1, PLA2G4A, NDUFC2, NME5, UGT1A6A, FH1, UGT1A6B, CYP2A5, ACOX2, TST, BDH1, DAD1, IMPAD1, ALDH1A1, ITPKA, AGPS, AGXT, TKT, FBP1, ALDH1A7, PAFAH1B2, ATP6V1B1, PDXK, OAT, PCX, NDUFB5, HDC, ODC1, HSD17B12, UQCR10, SGMS2, PTGS2, HSD17B10, PAPSS1, CKMT1, GMDS, MAT2A, HSD17B2, MGAT3, BPNT1, MGAT2, ATP6V0E2, PRPS1L3, CBR3, GALNT5, GALNT3, GCH1, TPK1, PTGES2, PTGES3, C1GALT1, MBOAT1, GCK, POLE4, CES1D, PSAT1, CES1E, MGAT4A, POLE3, UOX | 626        | 1269     | 7691      | 1.549           | 4.81E-07   | 2.41E-07  | 2.32E-07 |
| Metabolism of xenobiotics by cytochrome P450 | 22    | 1.195 | 1.35E-08 | GSTM4, CBR2, CBR1, GSTM2, UGT1A1, GSTO1, EPHX1, GSTT3, MGST1, ADH7, UGT1A6A, UGT1A6B, ALDH3A1, AKR7A5, GSTA4, GSTA3, ALDH3B1, CYP2S1, CYP2F2, GSTM7, GSTM6, CBR3                                                                                                                                                                                                                                                                                                                                                                                                                                                                                                                                                                                                                                                                                                                                                                                                                                                                                                                                                                                             | 626        | 64       | 7691      | 4.223           | 3.74E-06   | 1.25E-06  | 1.20E-06 |



|                         |    |       |          |                                                                                                                                                                                                    |     |     |      |       |          |          |          |
|-------------------------|----|-------|----------|----------------------------------------------------------------------------------------------------------------------------------------------------------------------------------------------------|-----|-----|------|-------|----------|----------|----------|
| Glutathione metabolism  | 18 | 0.978 | 8.61E-07 | GSTM4, GSTM2, GPX2, GGT6, GSTO1, IDH1, ODC1, GSTT3, MGST1, GPX8, PGD, GCLC, GSTA4, GSTA3, LAP3, GCLM, GSTM7, GSTM6                                                                                 | 626 | 55  | 7691 | 4.021 | 2.39E-04 | 5.98E-05 | 5.77E-05 |
| Peroxisome              | 18 | 0.978 | 2.98E-04 | PHYH, ACSL1, IDH1, MPV17L, MPV17L2, ACSL3, SOD2, DDO, SOD1, PRDX5, SLC25A17, ACOX2, PRDX1, AGPS, NUDT19, FARI, AGXT, HMGCLL1                                                                       | 626 | 83  | 7691 | 2.664 | 7.95E-02 | 1.18E-02 | 1.14E-02 |
| Hippo signaling pathway | 26 | 1.412 | 4.49E-04 | YWHAE, SERPINE1, PRKCZ, ACTG1, SOX2, PPP1CB, PPP2CA, WNT11, CCND1, YWHAQ, CDH1, YWHAH, FZD3, SMAD4, WNT7B, TRP73, FZD8, YWHAZ, PPP1CA, MOB1B, MOB1A, PPP2R2C, PPP2R2B, CTNNB1, BMPR1B, BMPR1A      | 626 | 151 | 7691 | 2.115 | 1.17E-01 | 1.56E-02 | 1.50E-02 |
| Mineral absorption      | 11 | 0.598 | 8.51E-04 | FTL1, FTH1, TRF, MT2, MT1, ATP1A1, SLC5A1, STEAP1, ATP1B1, STEAP2, SLC39A4                                                                                                                         | 626 | 39  | 7691 | 3.465 | 2.11E-01 | 2.63E-02 | 2.53E-02 |
| RNA transport           | 27 | 1.467 | 1.19E-03 | CYFIP2, POP7, SEH1L, DDX20, RASL2-9, SUMO3, NUP62, EIF4E, RPP38, EIF2B5, RANBP2, SEC13, EIF2B2, EIF1AX, THOC3, EIF2S1, EEF1A1, EIF5, NUP50, CLNS1A, GEMIN4, NUP98, RPP25, EIF3C, EIF1A, RAN, EIF3B | 626 | 170 | 7691 | 1.951 | 2.82E-01 | 3.01E-02 | 2.90E-02 |
| N-Glycan biosynthesis   | 12 | 0.652 | 1.56E-03 | GLT28D2, B4GALT1, DAD1, MGAT4A, ALG5, RPN1, ALG2, MGAT3, STT3A, MGAT2, ALG11, ALG10B                                                                                                               | 626 | 49  | 7691 | 3.009 | 3.53E-01 | 3.62E-02 | 3.49E-02 |
| Sulfur metabolism       | 5  | 0.272 | 3.91E-03 | MPST, TST, IMPAD1, BPNT1, PAPSS1                                                                                                                                                                   | 626 | 9   | 7691 | 6.826 | 6.63E-01 | 8.36E-02 | 8.06E-02 |

**Supplemental Table S2: Downregulated Kegg Pathway enrichment results.** Significantly downregulated genes based on differential gene expression (DeSeq) analysis with Benjamani-Hochberg p-adjusted < 0.1 were used for KEGG pathway generation. After KEGG pathway results were generated, only pathways with Benjamani-Hochberg p-adjusted < 0.1 are presented.

| KEGG Pathway                            | Count | %         | PValue   | Genes                                                                                                                                                 | List Total | Pop Hits | Pop Total | Fold Enrichment | Bonferroni | Benjamini | FDR      |
|-----------------------------------------|-------|-----------|----------|-------------------------------------------------------------------------------------------------------------------------------------------------------|------------|----------|-----------|-----------------|------------|-----------|----------|
| Choline metabolism in cancer            | 18    | 1.28<br>3 | 1.25E-04 | PDGFRA, PLA2G4F, DGKD, CHKA, SLC44A2, PRKCB, PLA2G4B, DGKA, WAS, PIK3CD, TSC1, DGKZ, PIK3R5, PLD2, MAPK10, DGKQ, RPS6KB2, DGKH                        | 474        | 101      | 7691      | 2.892           | 3.16E-02   | 1.84E-02  | 1.72E-02 |
| Fc gamma R-mediated phagocytosis        | 16    | 1.14<br>0 | 1.57E-04 | SYK, MYO10, PRKCB, PRKCD, WAS, ASAP3, PIK3CD, PIK3R5, PLD2, FCGR1, INPP5D, RPS6KB2, AMPH, DOCK2, FCGR2B, LAT                                          | 474        | 84       | 7691      | 3.091           | 3.96E-02   | 1.84E-02  | 1.72E-02 |
| Phosphatidylinositol signaling system   | 17    | 1.21<br>2 | 2.50E-04 | DGKD, PRKCB, DGKA, PIK3CD, OCRL, DGKZ, PIK3R5, INPP4A, PIKFYVE, INPP5D, DGKQ, INPP5K, IP6K1, PLCD3, PLCB2, IP6K2, DGKH                                | 474        | 97       | 7691      | 2.844           | 6.23E-02   | 1.84E-02  | 1.72E-02 |
| B cell receptor signaling pathway       | 14    | 0.99<br>8 | 2.86E-04 | CR2, CD72, SYK, PIK3CD, MALTI1, RASGRP3, PIK3R5, IKBKB, INPP5D, CD19, PTPN6, FCGR2B, CD22, CARD11                                                     | 474        | 70       | 7691      | 3.245           | 7.09E-02   | 1.84E-02  | 1.72E-02 |
| Glycerophospholipid metabolism          | 16    | 1.14<br>0 | 5.59E-04 | PLA2G4F, DGKD, PCYT2, CHKA, PNPLA7, PLA2G4B, DGKA, PLD4, TAZ, DGKZ, PLD2, PLA2G15, DGKQ, PNPLA6, LPIN2, DGKH                                          | 474        | 94       | 7691      | 2.762           | 1.34E-01   | 2.87E-02  | 2.68E-02 |
| Transcriptional misregulation in cancer | 22    | 1.56<br>8 | 1.13E-03 | CSF1R, TAF15, CCNT2, CSF2, LDB1, LMO2, ASPSCR1, PAX5, TRAF1, RUNX2, ETV5, BAIAP3, FCGR1, RXRB, LYL1, HHEX, MAF, EWSR1, IL2RB, ITGB7, HIST2H3C1, GRIA3 | 474        | 165      | 7691      | 2.163           | 2.53E-01   | 4.85E-02  | 4.53E-02 |
| Jak-STAT signaling pathway              | 20    | 1.42<br>6 | 1.36E-03 | STAT5A, IL15RA, PIAS3, STAT5B, CSF2, IL15, STAT2, PIK3CD, IFNLR1, TYK2, CSF2RA, PIK3R5, LEP, IL2RB, IL3RA, IL21R, EP300, PTPN6, IL7R, JAK3            | 474        | 145      | 7691      | 2.238           | 2.95E-01   | 4.88E-02  | 4.56E-02 |
| NOD-like receptor signaling pathway     | 11    | 0.78<br>4 | 2.22E-03 | IKBKB, MAPK10, NLRP1B, NAIP5, NLRP1A, NAIP6, CARD9, NLRP3, NOD1, NLRC4, MEFV                                                                          | 474        | 57       | 7691      | 3.131           | 4.35E-01   | 6.34E-02  | 5.92E-02 |
| GnRH signaling pathway                  | 14    | 0.99<br>8 | 2.63E-03 | MAP3K3, PLA2G4F, PRKCB, PLA2G4B, PRKCD, ADCY4, ADCY3, ADCY7, PLD2, MAPK10, MAPK7, GNRH1, CAMK2G, PLCB2                                                | 474        | 88       | 7691      | 2.581           | 4.92E-01   | 6.76E-02  | 6.31E-02 |

**Supplemental Table S3: Upregulated Kegg Pathway enrichment results.** Significantly upregulated genes based on differential gene expression (DeSeq) analysis with Benjamini-Hochberg p-adjusted  $< 0.1$  were used for KEGG pathway generation. After KEGG pathway results were generated only pathways with Benjamini-Hochberg p-adjusted  $< 0.1$  are presented.

| Biological Process           | Count | %     | PValue   | Genes                                                                                                                                                                                                                                                                                                                                                                                                                 | List Total | Pop Hits | Pop Total | Fold Enrichment | Bonferroni | Benjamini | FDR      |
|------------------------------|-------|-------|----------|-----------------------------------------------------------------------------------------------------------------------------------------------------------------------------------------------------------------------------------------------------------------------------------------------------------------------------------------------------------------------------------------------------------------------|------------|----------|-----------|-----------------|------------|-----------|----------|
| cilium morphogenesis         | 54    | 2.933 | 1.53E-18 | SPAG16, TTC26, SPEF2, TRAF3IP1, ULK4, CBY1, CDC14A, TCTN2, IQUB, TMEM107, TEKT3, NEK1, IFT57, SNAP29, DNAAF1, CCDC113, RFX3, KIF24, NME5, RPGRIP1L, WDR35, KIF27, IFT88, FAM161A, IFT81, TMEM216, WDPCP, RABL2, SSX2IP, CCNO, UNC119B, INTU, ARL6, ARL3, DYNC2LI1, IFT74, ARL13B, RAB23, TMEM67, NPHP3, TTC30A1, TTC30A2, DIERTD622E, BBS1, IFT122, FOXJ1, PARVA, TMEM231, DNAIC2, TTC8, TMEM17, TTC30B, B9D1, ATXN10 | 1461       | 170      | 18082     | 3.931           | 6.18E-15   | 6.18E-15  | 6.15E-15 |
| cilium assembly              | 44    | 2.390 | 1.68E-16 | SPAG16, TTC26, INTU, TRAF3IP1, ARL6, CBY1, CDC14A, DYNC2LI1, IFT74, ARL13B, TMEM67, RAB23, TCTN2, TMEM107, NEK1, TTC30A1, TTC30A2, IFT57, SNAP29, BBS1, CCDC113, RFX3, IFT122, FOXJ1, KIF24, NME5, RPGRIP1L, WDR35, KIF27, TMEM231, DNAIC2, TTC8, IFT88, TMEM17, FAM161A, TTC30B, IFT81, TMEM216, B9D1, WDPCP, RABL2, ATXN10, SSX2IP, CCNO                                                                            | 1461       | 129      | 18082     | 4.221           | 9.00E-13   | 3.40E-13  | 3.38E-13 |
| cell projection organization | 45    | 2.444 | 2.30E-14 | SPAG16, UNC119B, INTU, CCDC67, TRAF3IP1, ARL6, CCDC103, AK7, DYNC2LI1, IFT74, DCDC2A, TMEM67, TCTN2, TMEM107, IQUB, NEK1, TTC30A1, TEKT4, TTC30A2, SNAP29, DIERTD622E, DNAAF3, CCDC113, PIFO, IFT122, FOXJ1, KIF24, PARVA, WDR35, KIF27, TMEM231, DNAIC2, TTC8, RP1, IFT88, TMEM17, FAM161A, TTC30B, IFT81, TMEM216, ARMC4, B9D1, WDPCP, SSX2IP, CCNO                                                                 | 1461       | 151      | 18082     | 3.688           | 9.31E-11   | 3.11E-11  | 3.09E-11 |
| cell redox homeostasis       | 22    | 1.195 | 1.85E-08 | TXN1, TXNDC9, PRDX6B, PTGES2, NXN, GLRX5, TXNRD1, TXNL1, DNAJC16, PDIA6, PRDX6, PDIA4, GCLC, PRDX5, PRDX4, SCO1, TMX1, PRDX1, QSOX1, P4HB, VIMP, TXNDC5                                                                                                                                                                                                                                                               | 1461       | 65       | 18082     | 4.189           | 7.51E-05   | 1.72E-05  | 1.71E-05 |
| protein folding              | 32    | 1.738 | 2.12E-08 | TXN1, HSPA4L, TUBA1B, DNAJB6, BAG2, DNAJB4, QSOX1, CCT5, TXNDC5, CCT4, CCT3, RANBP2, RIC3, NUDC, ST13, VBP1, TXNL1, AHSA1, TBCC, PDIA6, PDIA4, CCT6A, TMX1, DNAJA4, CDC37, TCP1, DNAJA2, DNAJB11, PFDN1, P4HB, FKBP4, CRYAA                                                                                                                                                                                           | 1461       | 128      | 18082     | 3.094           | 8.59E-05   | 1.72E-05  | 1.71E-05 |
| oxidation-reduction process  | 93    | 5.052 | 4.44E-07 | TXN1, DHRS13, PYCRL, SRXN1, HIBADH, LOXL2, CHCHD4, AKR7A5, ALDH2, IYD, FADS6, FTH1, AOX3, ME1, QSOX1, ME2, CBR2, CBR1, PHYH, GPX2, GSTO1, DIO1, AKR1A1, GPX8, NDUFC2, PGD, PTGR1, CYP39A1, ALDH3A1, POR, ACOX2, ASPH, BDH1, TMX1, ALDH1A1, AGPS, AKR1C13, BLVRB, FAR1, STEAP1, STEAP2, ALDH1A7, FTO, NXN, NDUFB11, NDUFB5, MGS1, HSD17B12,                                                                            | 1461       | 676      | 18082     | 1.703           | 1.80E-03   | 2.64E-04  | 2.62E-04 |

|                                                                  |     |        |          |                                                                                                                                                                                                                                                                                                                                                                                                                                                                                                                                                                                                                                                                                                                                                                                                                                                                                                                                                                                                                                                                                                                                                                                                                                                                                                                                                                                                                                    |      |      |       |       |          |          |          |
|------------------------------------------------------------------|-----|--------|----------|------------------------------------------------------------------------------------------------------------------------------------------------------------------------------------------------------------------------------------------------------------------------------------------------------------------------------------------------------------------------------------------------------------------------------------------------------------------------------------------------------------------------------------------------------------------------------------------------------------------------------------------------------------------------------------------------------------------------------------------------------------------------------------------------------------------------------------------------------------------------------------------------------------------------------------------------------------------------------------------------------------------------------------------------------------------------------------------------------------------------------------------------------------------------------------------------------------------------------------------------------------------------------------------------------------------------------------------------------------------------------------------------------------------------------------|------|------|-------|-------|----------|----------|----------|
|                                                                  |     |        |          | UQCR10, ADH7, PTGS2, HSD17B10, DDO, LDHB, PRDX5, LDHA, PRDX4, RDH10, AGMO, PRDX1, CREG1, ALDH3B1, HSD17B2, CYP2F2, CHML, CBR3, MDH1B, CYB5B, SDR42E1, NQO1, WWOX, IDH1, TXNRD1, TXNL1, BBOX1, DHCR24, FMO3, DOHH, FAM213A, SOD2, CP, PRDX6, SOD1, HIGD2A, QDPR, SQLE, GRHPR, ADII, CYP2S1, PIR, ALDH18A1, CYB561, UOX                                                                                                                                                                                                                                                                                                                                                                                                                                                                                                                                                                                                                                                                                                                                                                                                                                                                                                                                                                                                                                                                                                              |      |      |       |       |          |          |          |
| positive regulation of telomerase RNA localization to Cajal body | 10  | 0.543  | 4.55E-07 | CCT6A, CCT3, SHQ1, RUVBL1, TCP1, NHP2, NAF1, CCT5, NOP10, CCT4                                                                                                                                                                                                                                                                                                                                                                                                                                                                                                                                                                                                                                                                                                                                                                                                                                                                                                                                                                                                                                                                                                                                                                                                                                                                                                                                                                     | 1461 | 15   | 18082 | 8.251 | 1.84E-03 | 2.64E-04 | 2.62E-04 |
| transport                                                        | 201 | 10.918 | 2.54E-06 | SLC23A2, PITPNA, AQP4, SLC4A4, ABRA, NIPAL4, CCDC91, COG8, STARD4, RBP4, RBP2, NUP98, BLZF1, SLC45A4, UNC119B, SEH1L, SLC45A3, ABCB6, SAR1B, SLC35D3, MTTP, ATP5J, SLC5A1, SLC5A3, GABARAP, SEC14L3, SCFD2, KCNMB1, TTPA, KCNMB2, ATP5D, KCNMB4, APOB, RAB11FIP4, SLC10A5, XBP1, SLC16A12, RAB39B, SLC16A11, CP, FXYD6, CLIC6, ARF4, ARF1, TRAM1, RAB7, ORM1, SLC35F3, SRPR, SLC7A11, OSBPL10, SERP1, CHMP1A, TMED2, TSPO, TMED7, SEC13, SLC2A12, SLC39A11, COMMD1, TMC5, SORCS2, VAMP8, CLDN10, RAMP3, SYPL, RASL2-9, UQCR10, SLC7A1, SLC7A2, LMAN2, ATP6V0E2, YKT6, BCAP31, RANBP2, GABRP, LRRC26, DYNLT1B, YIF1A, TMC01, RABIF, TTC8, ESYT3, CYB561, TXN1, MTCH2, SYS1, GOLT1B, RAB3D, HDLBP, TOMM20, CHCHD4, LAPTM4B, SLC39A9, SLC16A7, TMEM38B, KPNA3, SLC39A4, KPNA1, KCNH3, SLC38A1, MGMT1, SLC30A4, THOC3, ATP1B1, STIM1, TMX1, SCNN1B, SCG5, CHMP4B, RAB38, STEAP1, STEAP2, SLC26A2, TMED10, NDUFB11, KCNE4, ARL6, ARL3, SLC1A1, SLC01A5, SLC1A4, LIN7C, G3BP2, AP4S1, RAB6B, AP1M2, RAB4A, OSBPL3, M6PR, BSPRY, HIGD2A, 2610002M06RIK, CHMP2B, SPIRE2, IFT27, DYNLRB2, PLEKHF2, SLC48A1, OSCP1, TTC26, SFT2D3, SLC2A1, TRF, PCTP, BICD1, SEC61A1, MFSD5, NUP62, TNPO1, SNAP29, ABCC3, EIF5A, JAGN1, ABCC1, DYNLT3, NDUFC2, VPS37A, VPS37B, DDX19A, SLC25A17, CHMP3, SLC25A10, SEC22B, SLC25A5, SLC25A13, SEC22C, NDUFB5, RAB1B, GOSR2, ATP10A, SLC3A2, ATP1A1, ATP2C2, RAB25, RAB23, IGF2BP2, HNRNPA1, LRRC8E, SLC25A25, | 1461 | 1822 | 18082 | 1.365 | 1.02E-02 | 1.29E-03 | 1.28E-03 |

|                                          |    |       |          |                                                                                                                                                                                                                                                                                                                                                                                                                                                                                                                                                                                                 |      |     |       |       |          |          |          |
|------------------------------------------|----|-------|----------|-------------------------------------------------------------------------------------------------------------------------------------------------------------------------------------------------------------------------------------------------------------------------------------------------------------------------------------------------------------------------------------------------------------------------------------------------------------------------------------------------------------------------------------------------------------------------------------------------|------|-----|-------|-------|----------|----------|----------|
|                                          |    |       |          | SLC25A24, SLC12A2, D1ERTD622E, TIMM8B, CYB5B, KCNJ8, TMEM30B, TXNL1, KCNIP4, LCA5, KCNJ15, GOLPH3, CLCN5, RAB15, RAB18, KCNK1, KCNK2, SLC25A33, FOLR1, RAN, SLC25A35                                                                                                                                                                                                                                                                                                                                                                                                                            |      |     |       |       |          |          |          |
| ventricular system development           | 10 | 0.543 | 1.05E-05 | BBS1, MBOAT7, ULK4, ARMC4, HYDIN, NME5, MNAT1, DPCD, AK8, KIF27                                                                                                                                                                                                                                                                                                                                                                                                                                                                                                                                 | 1461 | 20  | 18082 | 6.188 | 4.18E-02 | 4.74E-03 | 4.72E-03 |
| cell-cell adhesion                       | 34 | 1.847 | 1.96E-05 | LAD1, LRRC59, TXNDC9, TES, HDLBP, TACSTD2, TWFI, SLC3A2, BZWI, FAM129B, CNN3, LDHA, BAG3, EPCAM, PRDX1, BSG, EIF4H, SFN, RPS2, LRRFIP1, EMD, YKT6, SPTBN2, NUDC, IDH1, AHS1, PARVA, YWHAZ, PRDX6, PAICS, EIF5, VAPA, GIPC1, TAGLN2                                                                                                                                                                                                                                                                                                                                                              | 1461 | 189 | 18082 | 2.226 | 7.65E-02 | 7.43E-03 | 7.39E-03 |
| protein transport                        | 78 | 4.237 | 2.02E-05 | PLEKHF2, TTC26, ARF4, RAB7, ARF1, TRAM1, SYS1, SFT2D3, GOLT1B, RAB3D, TOMM20, ABRA, CHCHD4, SEC61A1, CCDC91, SERP1, NUP62, CHMP1A, TNPO1, KPNA3, SNAP29, KPNA1, EIF5A, SEC13, JAGN1, COG8, VPS37A, COMMD1, VPS37B, VAMP8, DDX19A, CHMP3, CHMP4B, RAB38, NUP98, SEC22B, BLZF1, SEC22C, UNC119B, RAMP3, SEH1L, TMED10, SAR1B, ARL6, RAB1B, ARL3, GOSR2, RASL2-9, LIN7C, GABARAP, CALCR, RAB25, SCFD2, RAB23, LMAN2, AP4S1, YKT6, RAB6B, AP1M2, D1ERTD622E, BCAP31, RANBP2, TIMM8B, RAB4A, XBPI, LCA5, RAB39B, YIF1A, RABIF, GOLPH3, TTC8, 2610002M06RIK, RAB15, CHMP2B, RAB18, SPIRE2, IFT27, RAN | 1461 | 592 | 18082 | 1.631 | 7.85E-02 | 7.43E-03 | 7.39E-03 |
| intraciliary transport                   | 11 | 0.598 | 2.68E-05 | TTC26, IFT74, TTC30B, TRAF3IP1, IFT81, ARL3, LCA5, IFT27, TTC30A1, TTC30A2, IFT57                                                                                                                                                                                                                                                                                                                                                                                                                                                                                                               | 1461 | 27  | 18082 | 5.042 | 1.03E-01 | 8.38E-03 | 8.34E-03 |
| axoneme assembly                         | 10 | 0.543 | 2.69E-05 | SPAG16, RP1, LRGUK, RSPH1, RSPH4A, SPEF2, RSPH9, AK7, GAS8, CCDC40                                                                                                                                                                                                                                                                                                                                                                                                                                                                                                                              | 1461 | 22  | 18082 | 5.626 | 1.03E-01 | 8.38E-03 | 8.34E-03 |
| detection of calcium ion                 | 7  | 0.380 | 4.33E-05 | STIM1, KCNMB1, KCNMB2, KCNMB4, CALM3, CALM1, CALM2                                                                                                                                                                                                                                                                                                                                                                                                                                                                                                                                              | 1461 | 10  | 18082 | 8.664 | 1.61E-01 | 1.25E-02 | 1.25E-02 |
| response to endoplasmic reticulum stress | 18 | 0.978 | 9.35E-05 | EIF2B5, XBP1, SDF2L1, HSPA5, FAM129A, THBS1, EIF2S1, PDIA6, PDIA4, UFM1, TMX1, TMEM33, STC2, UFC1, TMBIM6, P4HB, NRBF2, TXNDC5                                                                                                                                                                                                                                                                                                                                                                                                                                                                  | 1461 | 76  | 18082 | 2.931 | 3.15E-01 | 2.48E-02 | 2.47E-02 |
| glutathione metabolic process            | 14 | 0.760 | 9.80E-05 | GSTM4, GSTM2, GGT6, GSTO1, IDH1, GSTT3, MGST1, SOD2, SOD1, GCLC, GSTA4, GSTA3, GCLM, GSTM7                                                                                                                                                                                                                                                                                                                                                                                                                                                                                                      | 1461 | 49  | 18082 | 3.536 | 3.28E-01 | 2.48E-02 | 2.47E-02 |
| epithelial cilium movement               | 8  | 0.435 | 1.31E-04 | SPEF2, ULK4, NME5, AK7, DPCD, KIF27, GAS8, CCDC40                                                                                                                                                                                                                                                                                                                                                                                                                                                                                                                                               | 1461 | 16  | 18082 | 6.188 | 4.13E-01 | 2.98E-02 | 2.97E-02 |
| response to heat                         | 15 | 0.815 | 1.33E-04 | EIF2B5, CALCA, EIF2B2, PEBP1, TACR1, HSPA2, SOD1, GCLC, CCKAR, DNAJA4, DNAJA2, CCL2, CD14, HSPA1B, LRP11                                                                                                                                                                                                                                                                                                                                                                                                                                                                                        | 1461 | 57  | 18082 | 3.257 | 4.16E-01 | 2.98E-02 | 2.97E-02 |

|                                 |    |       |          |                                                                                                                                                                   |      |     |       |       |          |          |          |
|---------------------------------|----|-------|----------|-------------------------------------------------------------------------------------------------------------------------------------------------------------------|------|-----|-------|-------|----------|----------|----------|
| embryonic digit morphogenesis   | 16 | 0.869 | 1.97E-04 | SMAD4, INTU, TRAF3IP1, IFT122, GRHL2, TMEM231, LMBR1, IFT88, CHST11, RAB23, IMPAD1, TMEM107, CTNNA1, B9D1, WPCP, BMP1A                                            | 1461 | 66  | 18082 | 3.000 | 5.50E-01 | 4.20E-02 | 4.18E-02 |
| epithelial cell differentiation | 16 | 0.869 | 2.35E-04 | TAGLN, EHF, UPK2, SIX1, DNPH1, CNN3, MUC1, UPK1A, TST, ELF3, CES1D, CASP6, TOLLIP, ANXA7, TAGLN2, CTSB                                                            | 1461 | 67  | 18082 | 2.956 | 6.14E-01 | 4.76E-02 | 4.74E-02 |
| cilium movement                 | 11 | 0.598 | 3.21E-04 | DNAIC2, RSPH4A, CCDC103, DNAAF1, ARMC4, HYDIN, LRRC6, RSPH9, DNALI1, GAS8, CCDC40                                                                                 | 1461 | 35  | 18082 | 3.890 | 7.28E-01 | 5.94E-02 | 5.91E-02 |
| motile cilium assembly          | 10 | 0.543 | 3.22E-04 | DNAAF3, INTU, DNAAF1, ULK4, FOXJ1, LRRC6, RSPH9, ZMYND10, IFT57, CCDC40                                                                                           | 1461 | 29  | 18082 | 4.268 | 7.29E-01 | 5.94E-02 | 5.91E-02 |
| response to oxidative stress    | 24 | 1.304 | 3.91E-04 | SLC23A2, PRNP, NQO1, ABCC1, GPX2, SRXN1, TAT, OGG1, IDH1, TXNRD1, GPX8, PEBP1, DHCR24, SLC7A11, SOD2, PTGS2, SOD1, RCAN1, GCLC, PRDX5, PRDX1, STC2, ALDH1A1, GCLM | 1461 | 133 | 18082 | 2.233 | 7.95E-01 | 6.80E-02 | 6.76E-02 |
| decidualization                 | 9  | 0.489 | 4.03E-04 | GJB2, CDH1, CTSL, STC2, BSG, LIF, PLA2G4A, PTGS2, CTSB                                                                                                            | 1461 | 24  | 18082 | 4.641 | 8.04E-01 | 6.80E-02 | 6.76E-02 |

**Supplemental Table S4: Downregulated biological processes via gene ontology analysis.** Significantly downregulated genes based on differential gene expression (DeSeq) analysis with Benjamani-Hochberg p-adjusted < 0.1 were used for gene ontology biological pathway generation. After results were generated, only biological processes with p-value < 0.001 are presented.

| Biological Process                | Count | %      | PValue   | Genes                                                                                                                                                                                                                                                                                                                                                                                                                                                                                                                                                            | List Total | Pop Hits | Pop Total | Fold Enrichment | Bonferroni | Benjamini | FDR      |
|-----------------------------------|-------|--------|----------|------------------------------------------------------------------------------------------------------------------------------------------------------------------------------------------------------------------------------------------------------------------------------------------------------------------------------------------------------------------------------------------------------------------------------------------------------------------------------------------------------------------------------------------------------------------|------------|----------|-----------|-----------------|------------|-----------|----------|
| phosphorylation                   | 79    | 5.631  | 2.16E-09 | SMG1, CIITA, TRIO, MAST3, DGKA, ARAF, PIK3CD, STK19, IKBKB, STK10, FASTK, SPEG, PRKG2, MAP3K8, JAK3, MAP3K5, EPHA4, PDGFRA, MAP4K2, EPHA7, RPS6KL1, SYK, PRKCB, PRKCD, TNNT3K, TYK2, DGKZ, D8ERTD82E, FGR, DGKQ, HKDC1, ULK3, PRKD2, ALPK3, EPHA1, ALPK1, BLK, CSF1R, PFKFB4, PKN3, PAPS2, CKMT2, DGUOK, MAPK7, MKNK1, STK38, GRK6, CSK, IP6K1, MARK3, CAMK2G, BUB1, MAP4K3, IP6K2, NTRK2, MAP3K3, HIPK4, CDK19, DMPK, CHKA, EIF2AK3, DCLK2, CDC7, EIF2AK4, MERTK, CLK4, CLK2, UCKL1, MAPK10, CLK1, CDK8, PIKFYVE, CDK5, FES, TAOK2, RPS6KB2, CDK10, PKN1, FGFR4 | 1144       | 612      | 18082     | 2.040           | 8.01E-06   | 8.01E-06  | 7.99E-06 |
| intracellular signal transduction | 57    | 4.063  | 1.67E-08 | DGKD, MAST3, DGKA, ARAF, CBLB, NRBP2, MCF2L, RGS9, JAK3, UNC13B, MAP4K2, SYK, PRKCB, NFAM1, PRKCD, HMHA1, TYK2, GMIP, DGKZ, LAX1, RASA4, DGKQ, PRKD2, PLCB2, RAPGEF3, RAPGEF4, ARHGFE6, DGKH, RGS14, PKN3, NPR2, ADCY4, ADCY3, NOD1, RASGRP2, RASGRP1, ADCY7, MKNK1, INPP5D, STK38, DVL1, CSK, MAP4K3, SH2B1, MAP3K3, STAC3, DCLK2, MYO9B, SMAD7, PIKFYVE, NEURL2, LEP, PTPN6, PKN1, RGS11, PLCD3, LAT                                                                                                                                                           | 1144       | 400      | 18082     | 2.252           | 6.21E-05   | 3.10E-05  | 3.09E-05 |
| protein phosphorylation           | 71    | 5.061  | 9.93E-08 | TRIO, MAST3, ARAF, IKBKB, STK10, NRBP2, FASTK, SPEG, PRKG2, MAP3K8, JAK3, MAP3K5, EPHA4, PDGFRA, MAP4K2, EPHA7, MORC3, RPS6KL1, SYK, PRKCB, STRADB, PRKCD, PHKA1, TNNT3K, TYK2, D8ERTD82E, FGR, ULK3, PRKD2, ALPK3, EPHA1, ALPK1, BLK, CSF1R, PKN3, NPR2, DGUOK, MAPK7, MKNK1, STK38, GRK6, CSK, MARK3, CAMK2G, BUB1, MAP4K3, NTRK2, MAP3K3, HIPK4, CDK19, DMPK, EIF2AK3, DCLK2, CDC7, GTF2H2, EIF2AK4, MERTK, CLK4, CLK2, P2RX7, MAPK10, CLK1, CDK8, PAN3, CDK5, FES, TAOK2, RPS6KB2, CDK10, PKN1, FGFR4                                                        | 1144       | 576      | 18082     | 1.948           | 3.69E-04   | 1.23E-04  | 1.23E-04 |
| immune system process             | 52    | 3.706  | 3.55E-07 | DCLRE1C, PIK3CD, LRMP, MAP3K8, JAK3, MAP3K5, MAP4K2, CR2, SYK, DDX58, PRKCB, SP110, LAX1, LIME1, TLR1, FCGR1, FGR, NAIP5, IRF3, NAIP6, IRF1, PRKD2, TLR7, CD300C, CSF1R, NLRP1B, UNC93B1, NLRC5, AKAP8, OAS1B, NOD1, NLRC4, MEFV, SAMHD1, LY9, INPP5D, BTLA, NLRP3, CSK, SLAMF6, GSDMD, SEMA4A, CARD9, LY86, SSC5D, EIF2AK4, SERPINA3G, MARCO, TBKBP1, HC, LAT, MYOIG                                                                                                                                                                                            | 1144       | 383      | 18082     | 2.146           | 1.32E-03   | 3.30E-04  | 3.29E-04 |
| transcription, DNA-templated      | 162   | 11.547 | 3.48E-05 | CRTC2, ZFP445, CCNK, PRDM9, ZFP444, CCNT2, HDAC10, PRDM6, UBP1, NOC2L, IKZF3, PNN, DACH1, ZFP30, SOX17, EP300, SOX8, CCNL2, ZFP579, PIAS3, TLE2, ZFP697, ZFP219, PRKCB, SP110, THOC1,                                                                                                                                                                                                                                                                                                                                                                            | 1144       | 1885     | 18082     | 1.358           | 1.21E-01   | 2.15E-02  | 2.15E-02 |

|                                               |    |       |          |                                                                                                                                                                                                                                                                                                                                                                                                                                                                                                                                                                                                                                                                                                                                                                                                                                                                                                                                                                                                      |      |     |       |       |          |          |          |  |
|-----------------------------------------------|----|-------|----------|------------------------------------------------------------------------------------------------------------------------------------------------------------------------------------------------------------------------------------------------------------------------------------------------------------------------------------------------------------------------------------------------------------------------------------------------------------------------------------------------------------------------------------------------------------------------------------------------------------------------------------------------------------------------------------------------------------------------------------------------------------------------------------------------------------------------------------------------------------------------------------------------------------------------------------------------------------------------------------------------------|------|-----|-------|-------|----------|----------|----------|--|
|                                               |    |       |          | HDGFRP2, RUNX2, MAF, DMTF1, EWSR1, TIMELESS, ZFP692, HOXB3, ZSCAN26, PREB, ZFP451, INO80D, NOTCH4, GATA2, HELZ2, ZFP57, ZFP182, DEAF1, ZKSCAN3, SAFB2, LPXN, NLRP3, E4F1, ZFP740, STAT5A, ZFP512, STAT5B, CBX7, ZFP511, SETDB1, BCL11A, SS18L1, PHF12, EAF2, RFXANK, POU2F2, POU6F1, SMAD7, CDK8, TFCEP2, TADA2A, GON4L, SNAI2, BRWD1, RBAK, ZSCAN2, RERE, ZMYND15, MESP1, CSRNP2, RARG, CIITA, HIP1, TCF25, PHF1, AKAP8L, HIF3A, MED12, LYL1, HHEX, SCML4, SIN3B, SIX5, ZMYM5, UIMC1, HMG20A, ZFP641, CIC, ZFP280D, ZFP280C, TEAD3, BATF2, MYOCD, ZFP532, PEG3, NCOA3, DNMT3A, ZFP932, MKL1, TET1, IL16, PROX2, PAX5, SIRT7, SAFB, COMMD4, TRAF7, GCFC2, KAT2A, IRF3, TAL1, ELF4, IRF1, TFEC, MED20, RBPJL, HDAC5, SP100, SMARCD3, SFSWAP, SRRT, ZBTB48, AKAP8, CXXC1, HDAC6, HDAC7, ZFP12, RXRB, TFPT, ABLIM2, RBBP5, ATOH8, HSF4, ZFP263, PCGF1, BRD8, HES2, MLXIP, BRF1, NFYA, STAT2, GTF2H2, TBX6, ZFP354A, PER3, POLR3A, TEF, PAGR1A, TNIP2, ERCC2, PKN1, PAXBP1, TARDBP, LPIN2, ZFP276, ZFP28 |      |     |       |       |          |          |          |  |
| innate immune response                        | 47 | 3.350 | 6.15E-05 | BLK, CSF1R, NLRP1B, NLRP1A, UNC93B1, AKAP8, NLRC5, PIK3CD, NOD1, OAS1B, NLRC4, MEFV, SAMHD1, LY9, MALT1, NLRP3, SLAMF6, TRIM26, CSK, JAK3, MAP3K5, GSDMD, MAP4K2, CR2, SYK, SP110, DDX58, CARD9, LY86, CYBB, SSC5D, TYK2, TLR1, FGR, FCGR1, MARCO, NAIP5, POLR3A, IRF3, FES, NAIP6, ELF4, IRF1, TBKBP1, TLR7, HC, TRIM11                                                                                                                                                                                                                                                                                                                                                                                                                                                                                                                                                                                                                                                                             | 1144 | 400 | 18082 | 1.857 | 2.04E-01 | 3.26E-02 | 3.25E-02 |  |
| regulation of Rho protein signal transduction | 16 | 1.140 | 8.12E-05 | ITSN2, TRIO, PLEKHG2, ARHGEF26, ARHGEF15, ARHGEF25, ARHGEF39, ARHGEF18, MYO9B, FGD6, ALS2CL, MCF2L, EPS8L1, ARHGEF1, ARHGEF40, ARHGEF6                                                                                                                                                                                                                                                                                                                                                                                                                                                                                                                                                                                                                                                                                                                                                                                                                                                               | 1144 | 77  | 18082 | 3.284 | 2.60E-01 | 3.63E-02 | 3.62E-02 |  |
| protein autophosphorylation                   | 27 | 1.924 | 8.80E-05 | CSF1R, SMG1, STK10, MKNK1, CSK, JAK3, CAMK2G, EPHA4, PDGFRA, NTRK2, MAP3K3, HIPK4, SYK, PRKCD, EIF2AK3, PHKA1, EIF2AK4, CLK4, CLK2, CLK1, FGR, CDK5, FES, ULK3, PRKD2, EPHA1, FGFR4                                                                                                                                                                                                                                                                                                                                                                                                                                                                                                                                                                                                                                                                                                                                                                                                                  | 1144 | 183 | 18082 | 2.332 | 2.79E-01 | 3.63E-02 | 3.62E-02 |  |
| peptidyl-tyrosine phosphorylation             | 14 | 0.998 | 1.81E-04 | STAT5A, PDGFRA, EPHA4, CSF1R, SYK, CLK4, CLK2, CLK1, FGR, FES, PTPN6, FGFR4, EPHA1, JAK3                                                                                                                                                                                                                                                                                                                                                                                                                                                                                                                                                                                                                                                                                                                                                                                                                                                                                                             | 1144 | 65  | 18082 | 3.404 | 4.90E-01 | 6.73E-02 | 6.71E-02 |  |
| peptidyl-serine phosphorylation               | 21 | 1.497 | 2.58E-04 | HIPK4, MORC3, SMG1, SYK, DMPK, PRKCB, MAST3, PKN3, PRKCD, EIF2AK3, DCLK2, CDC7, PKD1, CLK1, MAPK7, CDK5, MKNK1, STK38, RICTOR, PRKD2, PKN1                                                                                                                                                                                                                                                                                                                                                                                                                                                                                                                                                                                                                                                                                                                                                                                                                                                           | 1144 | 133 | 18082 | 2.496 | 6.17E-01 | 8.72E-02 | 8.69E-02 |  |
| phagocytosis                                  | 12 | 0.855 | 3.36E-04 | LEP, ELMO2, PLD4, PRTN3, CDC7, ABCA7, MYO7A, TULP1, MERTK, GATA2, UNC13D, MYO1G                                                                                                                                                                                                                                                                                                                                                                                                                                                                                                                                                                                                                                                                                                                                                                                                                                                                                                                      | 1144 | 52  | 18082 | 3.648 | 7.13E-01 | 1.04E-01 | 1.04E-01 |  |



|                               |    |       |          |                                                                                                               |      |    |       |       |          |          |          |
|-------------------------------|----|-------|----------|---------------------------------------------------------------------------------------------------------------|------|----|-------|-------|----------|----------|----------|
| regulation of GTPase activity | 14 | 0.998 | 4.50E-04 | NTRK2, EPHA4, TSC1, POT1B, OCRL, RASAL3, RASGRP1, RAP1GAP, RASGRP3, RASA4, RICTOR, EPHA1, AGRN, SBF1          | 1144 | 71 | 18082 | 3.117 | 8.13E-01 | 1.29E-01 | 1.28E-01 |
| B cell differentiation        | 15 | 1.069 | 5.10E-04 | HDAC5, CR2, DCLRE1C, BCL11A, POLM, 5830417110RIK, NFAM1, HDAC7, LYL1, HHEX, GON4L, CLCF1, EP300, JAK3, CARD11 | 1144 | 81 | 18082 | 2.927 | 8.50E-01 | 1.31E-01 | 1.31E-01 |
| sarcomere organization        | 9  | 0.641 | 5.30E-04 | NEURL2, ACTN2, TNNT2, TCAP, LDB3, NKX2-5, MYPN, TTN, LMOD2                                                    | 1144 | 31 | 18082 | 4.589 | 8.61E-01 | 1.31E-01 | 1.31E-01 |
| muscle contraction            | 11 | 0.784 | 9.88E-04 | TMOD1, CHRN1, ACTN2, TMOD4, TNNT2, SCN7A, TAZ, CLCN1, TRDN, TTN, LMOD2                                        | 1144 | 50 | 18082 | 3.477 | 9.75E-01 | 2.29E-01 | 2.29E-01 |

**Supplemental Table S5: Upregulated biological processes via gene ontology analysis.** Significantly upregulated genes based on differential gene expression (DeSeq) analysis with Benjamini-Hochberg p-adjusted  $< 0.1$  were used for gene ontology biological pathway generation. After results were generated, only biological processes with p-value  $< 0.001$  are presented.

| Phosphoglyceride Metabolism |                                |                                                                                |
|-----------------------------|--------------------------------|--------------------------------------------------------------------------------|
| Metabolite                  | Genes (network threshold)      |                                                                                |
|                             | Control                        | HFD                                                                            |
| 15-HEPE                     | No network                     | Was (0.74), Pik3r5 (0.87), Prkcb (0.97), Pik3cd (0.97)                         |
| 19,20-DiHDPA                | Chka (-0.85)                   | Pik3r5 (0.85), Prkcb (0.90), Pik3r5 (0.96)                                     |
| 11-HDHA                     | No network                     | Pik3r5 (0.87), Prkcb (0.90), Pik3cd (0.96)                                     |
| 14-HDHA                     | Prkcb (-0.76), Rps6kb2 (-0.72) | Was (0.72), Pik3r5 (0.86), Prkcb (0.90), Pik3cd (0.96)                         |
| B-cell Receptor Signaling   |                                |                                                                                |
| Metabolite                  | Genes (network threshold)      |                                                                                |
|                             | Control                        | HFD                                                                            |
| 15-HEPE                     | No network                     | Inpp5d (0.73), Fcgr2b (0.86), Pik3r5 (0.90), Ptpn6 (0.97), Syk (1), Pik3cd (1) |
| 19,20-DiHDPA                | No network                     | Cd19 (-0.72), Pik3r5 (0.75)                                                    |
| 11-HDHA                     | Rasgrp3 (-0.71)                | Inpp5d (0.74), Pik3r5 (0.88), Fcgr2b (0.90), Syk (0.93), Pik3cd (0.96)         |
| 14-HDHA                     | No network                     | Inpp5d (0.73), Pik3r5 (0.87), Fcgr2b (0.90), Syk (0.94), Pik3cd (0.96)         |

**Supplemental Table S6: Integration of transcriptomic and metabolomic analyses shows different network interactions for key n-3 PUFA-derived oxylipins with specific transcriptomic pathways.** Differential network analysis for select n-3 PUFA derived oxylipins (15-HEPE, 19,20-DiHDPA, 11-HDHA, and 14-HDHA) was conducted for genes present in the Phosphoglyceride metabolism and B-cell receptor signaling pathways using xMWAS, a software for data integration. Here the genes are listed for each metabolite network with its network threshold value.
